# Supplementary material for: In vitro evaluation of probiotic properties of Lactobacillus acidophilus AD125 and antagonism against Escherichia coli O157:H7 adhesion to Caco-2 cell
Source: Royal Society of Chemistry journal article supplement (doi:10.1039/d2fo03200g), 2023-01-01
Supplement: d2fo03200g1.xlsx [file d2fo03200g1.xlsx]

## Sheet: Sheet1
Strains	Inhibition zone (mm)
	Culture			CFS
Lactobacillus acidophilus AD125	20.47	20.9	20.04	15.67	14.55	13.43
Lactobacillus coryniformis CF1	15.4	13.32	11.24	10.83	7.69	9.26
Lactobacillus plantarum HRBCU-fs1	6.29	8.81	7.55	6.85	6.2	7.5
Lactobacillus plantarum LP 50	9.46	11.61	13.76	10.27	9.32	8.37
Strain	Remaining antibacterial activity (%)
	2 M NaOH			1 mg mL−1			1 mg mL−1			1 mg mL−1
	(pH=7)			Catalase			Proteinase K.			Papain
AD125	96.98	98.43	99.88	48.65	55.55	52.1	42.27	38.2	46.34	63.37	65.79	60.95
Time(h)	Simulating gastric juice												Simulating intestinal juice			Bile salt solution(w/v)
	pH 1.5			pH 2			pH 2.5			pH 3			(pH=6.8，0.1g L-1)			0.001			0.002			0.003
0	7.58	7.45	7.71	7.61	7.69	7.53	7.41	7.83	7.62	7.51	7.64	7.77	7.66	7.44	7.55	7.53	7.9	7.16	7.22	7.49	7.76	7.47	7.69	7.25
1	5.23	5.02	4.81	7.74	7.59	7.44	7.55	7.65	7.6	7.5	7.72	7.61	7.49	7.74	7.24	7.73	7.51	7.29	7.72	7.47	7.22	7.8	7.1	7.45
2	3.33	2.97	3.15	7.56	7.64	7.48	7.58	7.69	7.47	7.48	7.72	7.6	7.84	7.51	7.18	7.75	7.25	7.5	7.78	7.16	7.47	7.44	7.33	7.55
3	0	0	0	7.77	7.56	7.35	7.63	7.57	7.51	7.58	7.4	7.76	7.77	7.23	7.5	7.51	7.69	7.33	7.3	7.46	7.62	7.14	7.64	7.39
Strain	Autoaggregation			Coaggregation			Surface hydrophobicity						Bacteria counts of adhesion
	（%）			（%）			Toluene			Xylene			(100 cells-1)
							（%）			（%）
AD125	27.22	26.51	25.8	23.53	23.97	24.61	86.13	83.59	81.05	94.69	93.45	92.21	1176.54	1195.57	1157.51
